## Consolidation promotes rule discovery rather than semantic abstraction

Matorina, Nelly<sup>1</sup>, & Poppenk, Jordan<sup>1,2,3\*</sup>

1. Department of Psychology, Queen's University, K7L 3N6
2. Centre for Neuroscience, Queen's University, K7L 3N6
3. School of Computing, Queen's University, K7L 3N6

\* Corresponding author. 62 Arch St., Kingston, Ontario, Canada K7L 3N6, 613-533-6009, [jpoppenk@queensu.ca](mailto:jpoppenk@queensu.ca),

## Abstract

Human memory for recent events is believed to undergo reactivation during sleep. This process is thought to be relevant for the consolidation of both individual episodic memories and gist extraction, the formation of generalized memory representations from multiple, related memories. Which kinds of gist are actually enhanced, however, is the subject of less consensus. To address this question, we focused our design on four types of gist: inferential gist (relations extracted across non-contiguous events), statistical learning (regularities extracted from a series), summary gist (a theme abstracted from a temporally contiguous series of items), and category gist (characterization of a stimulus at a higher level in the semantic hierarchy). Sixty-nine participants (30 men, 38 women, and 1 other) completed memory encoding tasks addressing these types of gist and corresponding retrieval tasks the same evening, the morning after, and one week later. Inferential gist and statistical learning were retained over a week, whereas memory for associative gist (category and summary gist) decayed. Higher proportions of REM and more spindles were associated with worse performance in a statistical learning task controlling for time and after one week, respectively. Our results suggest consolidation processes promote discovery of rules through synthesis of episodes (statistical learning and transitive inference), rather than semantic abstraction per se (category and summary gist). They further support the view that REM sleep is involved in schema disintegration, which works against participants' ability to identify regularities within temporal series.

To better understand our world, we review the information contents of our experiences for patterns, extracting from those experiences the gist, or essential meaning (Brainerd & Reyna, 1990). "Gist extraction" of this kind can take time, and even sleep to emerge: participants who sleep typically demonstrate greater gist memory than those remaining awake for an equivalent period. This pattern has been observed in a variety of common paradigms, including transitive inference (Ellenbogen et al., 2007), statistical learning (Durrant et al., 2011), and false memory (Payne et al., 2009). One perspective on this gradual emergence of gist is that it reflects the qualitative reorganization of memories during sleep, where new memories emerge that were never learned directly (Landmann et al., 2014); and several researchers have proposed theoretical frameworks that this occurs either during slow-wave sleep (SWS; Durrant, 2011) or rapid eye movement (REM) sleep (Walker and Stickgold, 2010). However, not all "gists" stand to benefit from such reorganization. For example, remembering the gist of a photograph (such as whether it was taken indoors or outdoors) requires extracting the image's category without necessarily relating the image to others. We therefore asked the question: do common sleep mechanisms underlie extraction of various gists, and do the various gists benefit differentially?

During SWS, slow oscillation field potentials (< 1 Hz) are temporally synchronized with thalamo-cortical spindles (7 – 15 Hz) and hippocampal ripples (140-220 Hz (Diekelmann & Born, 2010)). This process is thought to reactivate memories in the hippocampus, promoting memory consolidation (Marshall & Born, 2007). Consistent with this "mere reactivation" view, Walker and Stickgold (2010) proposed that SWS supports veridical memory consolidation that keeps individual memories distinct. Under this framework, SWS should preferentially amplify gists internal to a stimulus, such as remembering category gist in the example above. In an alternative model, the information overlap to abstract (IOtA) theory, Lewis and Durrant propose that repeated reactivation of overlapping memory elements leads to strengthening of these shared elements (2011). Consistent with this theory, duration of SWS correlated with improvement in a statistical learning task (Durrant et al., 2011) and participants had more slow-wave activity after integrating words into an existing vocabulary (Tamminen, Ralph, & Lewis, 2013). Under the IOtA account, gist requiring memory integration, such as transitive inference (a task requiring the stitching together of pair relations to make inferences), should preferentially benefit from SWS.

Adding further complexity, Walker and Stickgold (2010) proposed cortico-cortical processing in association areas during REM might facilitate associative linking in different cortical areas. In particular, they proposed REM involvement in three forms of memory integration, all of which contribute to the construction of higher-order schemas: unionization of recent related items, assimilation of new items into established networks, and the abstraction of general rules. Along these lines, higher performance in a probabilistic learning task predicted that more of the subsequent night would be spent in REM sleep (Djonlagic et al., 2009), suggesting that REM is upregulated and promotes reactivation of the same circuits involved in learning.

Here, we took the novel approach of juxtaposing the effects of sleep on four gists, each reflecting an apparently different gist extraction operation: inferential gist, which requires extraction of relations across non-contiguous events; statistical learning, in which regularities must be extracted from a series; summary gist, in which a theme is abstracted from a temporally contiguous series; and category gist, requiring characterization of a stimulus at a higher level in the semantic hierarchy. We define these four gists in Box 1, and provide visual depictions of the tasks we used to measure them in Figure 1. We reasoned that the role of REM or SWS in gist memory would be best elucidated by

comparing the effect of these sleep stages on different gists. We anticipated that each gist would either increase over time, or decay at a slower rate than our reference measures, detail memory.

We also took an individual differences approach: because false memory, transitive inference, and statistical learning have all been shown to have sleep effects compared to wake, we wanted to probe these effects deeper by looking only at individual differences in sleep stages. We predicted that participants with either more SWS or REM sleep would have better gist memory. We preregistered our hypotheses on the Open Science Framework (OSF; Matorina & Poppenk, 2019).

## Method

### Participants

104 participants were recruited in Kingston, Canada using posters, Facebook advertisements and web posts on Reddit, Kijiji and Craigslist. Participants were required to be: between 22-35 years of age (to avoid potential developmental effects); right-handed, an English native-speaker, have normal or corrected-to-normal vision and hearing, typically sleep at least 5 hours a night, have no contraindications for MRI scanning, have no history of neurological disorders, sleep disorders, or recurrent mental illness that included medication, and not currently be taking psychotropic medications.

Recruits meeting these criteria were invited to undergo a two hour in-person screening session in which demographic eligibility was confirmed, and a simulated MRI scanner was used to rule out claustrophobia, inability to keep still (operationalized as falling below the 95<sup>th</sup> percentile of low-frequency motion as measured in a reference sample), and inability to stay awake for a 20-minute eyes-open resting session. In addition, we assessed participants' ability to respond to at least 33% of encoding trials in a recognition memory task, to obtain a  $d'$  of at least 0.1 in a subsequent memory test, and to demonstrate acceptable reading comprehension and speed (a TOWRE score of at least 26.4 and a Nelson-Denny score of 2). Finally, participants were excluded for multiple no-shows, failing to follow instructions, rudeness, and excessive drug use. Participants were advised that they would be compensated CAD\$20 for their time (or a pro-rated amount in the case of early withdrawal).

Of the original sample, 69 participants met our criteria and returned to complete the full experiment. The average age of participants who did so was 26.83 years ( $SD = 4.21$  years). They described themselves as men ( $n = 30$ ), women ( $n = 38$ ), and other ( $n = 1$ ). We used G\*Power 3.1 to calculate a sensitivity power analysis, and found that based on our sample size of 69 participants and models with 3 predictors, we had 80% power to detect a small (0.09) effect size.

### Procedure

After their screening session, participants wore a sleep EEG device (Sleep Profiler, Advanced Brain Monitoring, Carlsbad, CA; see Fig. 3A) for a habituation night, during which they became accustomed to wearing and operating it. After the habituation night, on the basis of the recorded data, participants received corrective training as necessary.

Participants conducted an initial study phase during an evening visit, which was followed by a test phase (Pre-Sleep test). After sleeping at home while measuring their own sleep using a take-home sleep EEG device, they returned the next morning (12 hours after their initial session) for another memory test (Post-Sleep test). A week later, they returned for a final memory test (Day 7). They also completed an MRI session several weeks after testing.

The study session and each test visit included a study or test phase from each of four memory tasks (Fig. 1). These included a transitive inference (TI) task (inferential gist), a Deese, Roediger and McDermott (DRM) task (summary gist), a visual statistical learning (VSL) task (statistical learning), and a word-scene associative memory task (category gist). These tasks are described in detail below. After each study and test session, participants were encouraged to take a break. In addition, we administered an operation span task (OSPAN) at each session to measure participant fatigue.

In TI and VSL tasks, participants needed to learn complex relationships among items to be tested at multiple time points. We could not test a different set at each time point, as the large number of relationships involved could generate high interference and require excessive study time. Instead, we used two distinctive sets in a way designed to assess possible test-retest effects (see Fig. 1). We also found during piloting that participants were often unable to establish relationships among members of particular sets; having two sets increased the odds that participants would have above-chance memory for at least one. Section A was tested twice at the Pre-Sleep test, once at the Post-Sleep test, and once at Day7. Section B was tested once at each test session. Due to an error, for three participants, more than 7 sessions were administered. In these cases, we measured only the first administration.

In the TI task, there were no test-retest effects for premise pairs, first-order inferences, or second-order inferences between the two tests at the Pre-Sleep session,  $p_s > .407$ , suggesting any longitudinal trends were unlikely to be attributable to repeated testing. Also, both sections A and B were independently above chance for all time points,  $p_s < .001$ . In the VSL task, Section A was also above chance at all time points,  $p_s < .001$ , but Section B was not at the Post-Sleep test,  $p = .55$ , or Day7 test,  $p = .58$ , possibly because the stimuli in Section A were more memorable or more different from one another. Therefore, we evaluated only Section A. We excluded one participant who did not have any data on Section A due to an error. The statistical learning task was divided into deterministic and non-deterministic sequences, which we will describe in detail in the following section. There was a significant test-retest effect in memory for deterministic sequences from Section A,  $t(44) = -2.09$ ,  $p = .043$ ,  $r = .86$ , indicating that as participants were tested on the material a second time during Pre-Sleep test, their scores improved. There was no significant test-retest effect in memory for non-deterministic sequences from Section A,  $t(44) = 0.06$ ,  $p = .951$ ,  $r = .72$ .

As the data collection effort involved collaboration with researchers investigating a variety of individual differences within our participant group, our participants also completed further experimental sessions involving objectives unrelated to the current study goals (to be reported elsewhere).

## Tasks

*Visual statistical learning (VSL).* VSL (Turk-Browne, Junge, & Scholl, 2005) provides a measure of statistical learning, which has been defined as implicit learning of patterns that are automatically segmented from a continuous environment (such as co-occurring shapes in a sequence; Turk-Browne, Scholl, Johnson, & Chun, 2010). To implement this task, we modified a publicly-shared script (described by Turk-Browne et al., 2005) obtained from the *Millisecond Test Library*. During learning, participants were shown four blocks of a stream of red and green shapes over 312 trials (each appearing for 400 ms with 200 ms post-trial duration) and instructed to attend to shapes of one color or the other, pressing a key whenever a shape of that color repeated. Two blocks were shown for each stimulus set, which were interweaved. At test, in each of 64 trials, participants were

presented with two short series of three shapes familiar from the learning phase (each appearing for 400 ms with an inter-series interval of 1s) and instructed to select the temporal sequence that seemed more familiar. Some triplets were sequences seen in the previous learning task (e.g., ABC), and others were novel sequences (e.g., AEG). In our adaptation of this task, half of target triplets involved shapes that always appeared in the same order during training (i.e., deterministic sequences; e.g., ABC), whereas the rival sequence was never encountered (e.g., BAC). The other half of triplets sometimes also appeared in the rival sequence (i.e., non-deterministic sequences; e.g., ABC was presented at a 3:1 ratio to BAC). The sequence that was presented more frequently was always considered the correct answer. An inter-stimulus interval (ISI) of 1s separated test trials.

*Transitive inference (TI)*. The TI task (Ellenbogen, 2007) provides a measure of inferential gist, or the ability to make inferences across paired associates that form an implicit hierarchy (e.g.,  $A > B > C > D$ ). To implement this task, we again modified a script (described by Frank et al., 2004) obtained from the *Millisecond Test Library*. During study, participants were introduced to the hierarchy by being presented with four pairs of symbols (i.e., “premise pairs”; e.g., A and B), and asked to guess the winning symbol (e.g.,  $A > B$ ; Fig. 1B). For each premise pair, the winning symbol was counterbalanced on the left and right sides. Participants were given feedback for 150ms about the correctness of their guess after each study trial. Participants studied two stimulus sets, which were divided by a mandatory 12 second break with an option to resume anytime thereafter. After reaching a criterion of 75% correct responses or completing 200 trials, they completed 180 test trials without feedback testing both the original premise pairs as well as inference pairs (e.g.,  $B > D$ ). Participants completed 20 test trials per premise and inference pair (five premise pairs, two first order inference pairs ( $B > D$  and  $C > E$ ), one second order inference pair ( $B > E$ ), and one non-inference pair ( $A > F$ ). Test trials advanced following a response by the participant. Inference pairs are higher-order relationships that must be inferred from the relationships between lower-order relationships (e.g., correctly identifying that  $A > C$  would require inference from the premise pairs  $A > B$  and  $B > C$ ). Correctly inferring such higher order relationships is taken as evidence for the formation of a superordinate hierarchy.

*Word-scene associative memory (AM)*. The goal of the AM task was to provide gist and detail memory measures that were internal to an individual stimulus, rather than linked across a series or set of items. Our approach was to use single words to cue scene associates that could be characterized in various levels of detail. We probed four measures of memory for each studied item: super-category (general semantic category of scene, e.g., “hotel”), category (room type within category, e.g., “lobby”), instance (specific exemplar of a lobby), and detail (exact contents of the scene). Scene associates belonged to three super-categories (e.g., *house*, *restaurant*, *school*), which were all divided into 3 categories (e.g., *bathroom*, *bedroom* and *kitchen* for the ‘house’ category). Each category contained 3 instances (e.g., the room-type category *kitchen* contains 3 separate kitchens). Finally, each instance contained 3 detail variants. One detail image was the one originally studied and the other two have been edited to replace one object with a novel object. During the study phase, participants viewed each word-scene pair for 8 s under incidental learning instructions designed to bind the word cue and picture associate: in particular, to decide whether the “name” each room had been given could plausibly have been assigned based on an object found in that room. A 0.5 s ISI separated each trial. During test, participants were cued with the word associate for 1 s, the answered a cascade of two-



option forced-choice questions about its associate, deciding on whether it is a word associated with a noise or room image, super-category, category, instance, then details. Each probe in this series of four probes was presented for 3.5 s with a pause of 0.3 s between each probe, and a 1 s ISI between each trial. For each multiple-choice question, lures were selected within the correct answer to the prior probe (e.g., if the correct super-category of an associate to a word was “house”, the options for the category probe would be *bathroom*, *bedroom* and *kitchen*). Each probe was presented in visual format: e.g., house, restaurant and school icons were presented. In the instance probe, all options were shown using a variant of the images that excluded the feature to be assessed in the final “detail” probe, so as not to reveal the correct answer in that final stage. During each of the three test sessions, we tested participants on three previously-untested super-categories to avoid test-retest effects.

*Deese, Roediger and McDermott (DRM)*. The DRM task provides a measure of summary gist, the ability to extract meaning common to a set of related items. The difference between summary gist and inference gist is described by Stickgold and Walker (2013) as being akin to the difference between sets and relations, respectively. To implement this task, we again modified a publicly-shared script obtained from the *Millisecond Test Library*. During study, participants were asked to learn 27 lists of 14 related words each. Words were presented with a stimulus onset asynchrony of 1.5 seconds, with each list separated by 6 s break during which participants were asked to solve simple math problems. During test, participants were presented with 27 target words (old words from the study list), 9 critical lures (related words associated with the theme of each word list) and 36 unrelated lures (new words from an unstudied category). These words were presented one at a time in random order and trials only progressed when participants made a response, selecting among ‘remember’, ‘related’, or ‘new’.

In analysis of this task, our goal was to derive gist and detail measures from the 3x3 matrix of old, related and new responses to old, related, and new items. Stahl and Klauer (2008) used response rates to model group estimates of gist and detail; however, this approach failed when running models for individual participants. We instead modelled summary gist using a  $d'$ -based analysis, drawing inspiration from Dandolo and Schwabe (2018), who described two relevant models. An “Old Distinct” model expects old memory representations to be distinct from both related and new ones, indicating a precise detailed memory; and an “Old and Related Similar” model expects old and related memory representations to be quite similar, while being distinct from new items (suggesting that gist has been encoded but detail has not). Because one model captures only detail, and the other only gist, the two are orthogonal. We adapted this framework to our task: in the “Old Distinct” model, hits were the proportion of old responses to old items, and false alarms were the proportion related responses to old items (we refer to this model as word detail). In the “Old and Related Similar” model, hits were the proportion of old or related responses to old or related items, and false alarms were the proportion of new responses to old or related items (we refer to this model as summary gist). To assess the latter model, we collapsed old and related rows and columns from our 3x3 matrix, yielding a 2x2 matrix of old+related and new responses to old+related and new items for each participant. Finally, we replaced all values of 0 and 1 in the resulting 2x2 matrix with 0.00001 and 0.9999 in order to avoid hit or false alarm rates of 0 or 100%. Then, we calculated  $d'$  values for both the “Old Distinct” (memory for individual words) and “Old and Related Similar” (summary gist) models.

*Operation span (OSPAN)*. Lopez, Previc, Fischer, Heitz, and Engle (2012) found that the simulated flight performance of sleep-deprived Air Force pilots was predicted by OSPAN. Hence, it is often used as a suitable proxy for performance-related fatigue. Here, we used the OSPAN task to measure and control for variability in participant alertness across each test phase, using a task described by Unsworth, Heitz, Shrock, and Engle (2005) and obtained from the *Millisecond Test Library*. The task consisted of 5 practice letter questions, 15 practice math questions and 15 testing trials. Practice trials had no time limit and featured a 0.5s ITI. For practice letter questions, three to seven letters were shown in series on the screen. Each letter was presented for 1 second with a 200ms ISI. After presentation, participants were asked to enter the letters that they had seen in the correct sequence on the onscreen keyboard. Participants received feedback on their answers for 2 seconds. For practice math questions, participants were asked to complete math operations (e.g.,  $(1*2)+1$ ). They were instructed to complete the math problem as quickly as possible. Once they had an answer, they clicked the button to progress to the next screen. A possible answer was displayed on screen and participants were asked to indicate whether the answer is 'true' or 'false'. Practice trials were used to calculate the mean time that it takes a participant to solve math problems. For test trials, letter and math questions were intermixed, and there was a limit of the participant's average math problem time plus 2.5 SDs before the trial progressed on its own (to discourage letter rehearsal). Each test block consisted of both letter and number trials. There were three blocks of each of the five set sizes (i.e., there were three repetitions of 3, 4, 5, 6, and 7 letter and number sizes). The shortened OSPAN consisted of five practice letter questions, five practice math questions and one block of each of four set sizes (i.e., one repetition of 3, 4, 5, and 6 letter and number sizes).

## Apparatus

Participants completed three sessions individually in a testing room. One task was executed using MATLAB with Psychtoolbox (Kleiner et al., 2007) and SuperPsychToolbox (Mountjoy & Poppenk, 2015). The remaining three tasks (OSPAN, DRM, VSL, and TI) were executed using Inquisit (Version 5.0.6.0, 2016). For sleep stage measures, we used the Sleep Profiler, a single-channel electroencephalography (EEG) device worn on the forehead that records at 256 Hz from three sensors at approximately AF7, AF8, and Fpz (Lucey et al., 2016; Sleep Profiler Scoring Manual, 2015). The device applies a 0.1 Hz low-frequency filter and a 67 Hz high-frequency filter. Expert review of Sleep Profiler data and concurrently-collected data from a full polysomnography (PSG) net (which is broadly regarded as a "gold standard" for sleep data collection) has previously resulted in strong agreement for total sleep time ( $ICC = 0.96$ ) and REM sleep ( $ICC = 0.92$ ), and poorer agreement for Stage 1 ( $ICC = 0.66$ ) and Stage 3 ( $ICC = 0.67$ ; Lucey et al., 2016). Agreement for Stage 3 increased when combined with Stage 2 into a non-REM (NREM) measure ( $ICC = 0.96$ ).

The Sleep Profiler system also features automated sleep-staging software, which we manually validated using a subset of raw sleep data (described below) gathered using our Sleep Profiler. Briefly, as described by Levendowski and colleagues (2017), the software first rejected 30-second epochs where the absolute amplitude was  $\geq 500 \mu V$ , applied a notch filter, and then an infinite impulse response band pass-filter to obtain 16 Hz samples of the power values for delta (1-3.5 Hz), DeltaC (delta power corrected for ocular activity), theta (4-6.5 Hz), alpha (8-12 Hz), sigma (12-16 Hz), beta (18-28 Hz), and EMG bands ( $> 40$  Hz with a 80 Hz, 3 dB rolloff). Another set of power values was derived after application of a 0.75-Hz high-pass filter. Both filtered and unfiltered power spectra were used to stage sleep. If at least 15 s of valid data was available, AF7-AF8



channels were used for scoring, followed by AF7-Fpz and AF8-Fpz. When either of the latter were used, power spectra were increased to compensate for signal attenuation due to shorter interelectrode distances.

Power spectra averaged from 16 to 4 Hz were used to detect sleep spindles, which were characterized by spikes in absolute and relative alpha and sigma power that met empirical thresholds. Spindles were at a minimum 0.25 Hz in length with no maximum. To reduce misclassifying spindles, beta and EMG power bands had to be simultaneously surpassed relative to the alpha and sigma power.

## **MRI data acquisition**

Due to a separate line of research proposing that the anterior hippocampus is specialized for gist memory and the posterior for detail (Poppenk, Evensmoen, Moscovitch, & Nadel, 2013), we also collected structural MRI data. The day prior to each participants' MRI scan, they completed a biofeedback session in the simulated MRI scanner to become better habituated to an MRI-like environment and learn to reduce their head movement (and thereby improve the signal quality of their brain images sampled the next day). During the biofeedback session, participants viewed a 45-minute documentary with a live readout of their head motion overlaid. When their head motion exceeded an adaptive threshold, the documentary was paused for several seconds while static was played on the screen along with a loud, unpleasant noise. Following the documentary, a brief memory test was administered outside of the mock scanner to ensure participants were paying attention to the film content rather than just their motion (not analyzed here).

The next day, we used a whole-body MRI scanner (Magnetom Tim Trio; Siemens Healthcare) to gather a variety of image sequences over the course of a 1.5 hour scan. As described in our pre-registration, our hypotheses in the current study related specifically to the medial-temporal lobe anatomical analyses. To assess these predictions, we gathered high-resolution whole-brain T1-weighted (T1w) and T2-weighted (T2w) anatomical images (in-plane resolution 0.7 x 0.7 mm<sup>2</sup>; 320 x 320 matrix; slice thickness 0.7 mm; 256 AC-PC transverse slices; anterior-to-posterior encoding; 2 x acceleration factor; T1w TR 2400 ms; TE 2.13 ms; flip angle 8°; echo spacing 6.5 ms; T2w TR 3200 ms; TE 567 ms; variable flip angle; echo spacing 3.74 ms) and an ultra-high resolution T2-weighted volume centred on the medial temporal lobes (resolution 0.5 x 0.5 mm<sup>2</sup>; 384 x 384 matrix; slice thickness 0.5 mm; 104 transverse slices acquired parallel to the hippocampus long axis; anterior-to-posterior encoding; 2 x acceleration factor; TR 3200 ms; TE 351 ms; variable flip angle; echo spacing 5.12 ms). The whole brain protocols were selected on the basis of protocol optimizations designed by Sortiropoulos and colleagues (2014). The hippocampal protocols were modeled after Chadwick and colleagues (2014).

## **Hippocampal volumes**

As noted in our pre-registration, we did not have any specific hypotheses regarding laterality for hippocampal variables. Therefore, before beginning data analysis, we decided to perform a Pearson's correlation of aHPC and pHPC volumes across hemispheres. If the correlations were greater than 0.9, we would merge the volumes across hemispheres. Otherwise, we would run them separately in our models. aHPC volumes across hemispheres had a correlation of 0.686, and pHPC volumes across hemispheres had a correlation of 0.458. Therefore, we analyzed left and right hippocampal volumes separately in all of our models, investigating only either left or right hippocampal volumes in any given model.

The ultra-high-resolution T2w 0.5mm isotropic medial temporal lobe scans were submitted to automated segmentation using HIPS, an algorithm previously validated to

human raters specialized in segmenting detailed neuroanatomical scans of the hippocampus (Romero, Coupé, & Manjón, 2017). Three independent raters (including one of the authors) were trained on segmenting the hippocampus at the uncus apex into aHPC and pHPC segments, and achieved a Dice coefficient of absolute agreement of 80%. Two of these raters (including one of the authors) independently segmented all participants in this study using the 0.5mm T1w scans. The T2w medial temporal lobe scans were registered to the T2w whole-brain scans, which were in turn registered to the T1w whole-brain scans, and the combined transform was used to place the rater landmarks on the detailed medial temporal lobe scans. All voxels belonging to the hippocampus posterior to this coronal plane containing this point were classified as posterior hippocampus (pHPC), whereas all points anterior to and including this plane were classified as anterior hippocampus (aHPC). Finally, the total number of voxels in each subregion was multiplied by the volume of each voxel to obtain a total aHPC and pHPC volume. These steps were followed separately in each hemisphere. Freesurfer segmentation of the T1w and T2w brain data (v6.0; Fischl et al., 2004) was used to compute Estimated Intracranial Volumes, which in turn were used to control for effects of overall head size in the hippocampus volume vectors.

### **Sleep Profiler validation**

We selected a random subset of ten participants and used their raw sleep EEG data for validation of the Sleep Profiler auto-staging. Two independent raters rated the data and we took the average of their ratings. Prior to scoring, we pre-registered on OSF that if intra-class correlations (ICCs) were good (between 0.75 and 0.9) or excellent (over 0.9) for SWS, REM sleep, and TST (Koo & Li, 2016), we would use the sleep stage values derived from the automated scoring system. If they were below 0.75, then we would manually score the sleep data. We used an ICC measure that estimates the degree of consistency across measurements rather than absolute values (McGraw & Wong, 1996).

ICCs between the automated scoring system and two independent raters, as well as inter-rater ICCs, are given in Table 1. Human rater agreement with one another was excellent for TST and REM, whereas their agreement with the algorithm was lower, at a level closer to 0.8 (good). Human rater agreement with the algorithm was also good for SWS, whereas SWS agreement among human raters was only moderate. Having observed consistently good algorithm classification performance (with all ICCs above a cutoff of 0.75), we therefore used the sleep stage values derived from the automated scoring system for all of our analyses. We did, however, perform a manual quality control inspection of the sleep data to remove 1) any recordings that contain no SWS or no REM, 2) partial recordings that did not contain the full night of sleep, and 3) recordings where a participant's total sleep time was less than 50% of how much they typically reported sleeping on weekdays. This resulted in the omission of data from four participants.

### **Data analysis**

As preregistered, we excluded data falling three median absolute deviations above or below the mean of each variable. To investigate relationships among gist and detail variables, we ran Pearson correlations. To investigate predictors of patterns of change in gist and detail over the course of a week, we used multi-level modelling (MLM) implemented in the nlme package in R (R Core Team, 2016; Pinheiro, Bates, DebRoy, Sarkar, & Team, 2007). Multi-level modelling allowed us to estimate an individual change function in each participant, as well as predictors of this change function. Therefore, this analysis is especially suitable for looking at individual differences in change over time (Nair, Czaja, & Sharit, 2008). In the models, we estimated each participant's change over

three time points at Level 1 and individual differences at Level 2. Our predictors were Time, as well as Level 2 predictors related to individual differences in sleep and hippocampal volumes. We first ran random intercept and random slope models, and if this model did not converge, we ran random intercept only models. Time was coded as 0 for Pre-Sleep, 1 for Post-Sleep, and 2 for Day7. In all multi-level models, we included grand-mean centered hippocampal volumes (aHPC and pHPC) or sleep stages (proportion of SWS or REM) as predictors. We also included fatigue (OSPAN) as a control variable. Outcome variables were measures of gist memory on four different tasks at 3 time points: in the same evening as study (Pre-Sleep), the next morning (Post-Sleep), and one week later (Day7). To balance control for multiple comparisons with experimental power, we selected a 0.05 False Discovery Rate for each independent variable (Benjamini & Hochberg, 1995). Lastly, to investigate whether gist and detail measures decayed at different rates, we conducted two MANOVAs. For the AM and DRM tasks, we conducted a MANOVA for 3 time points and 3 dependent variables, followed up by ANOVAs. For the TI task, we conducted a MANOVA for 3 time points and 2 dependent variables, followed up by ANOVAs.

## Results

The goal of our study was to investigate the influence of sleep, including specific sleep stages, on different forms of gist, juxtaposing those requiring rule extrapolation from relations against those requiring gist extraction from sets. We approached this question both within-subjects – evaluating relative change in memory over time – as well as between-subjects, evaluating the predictive power of sleep variables over gist extraction. We began our between-subjects analysis by investigating correlations among our memory variables to identify possible correspondence among memory types. We then compared gist and detail memory variables within the same tasks using a MANOVA. Afterwards, we investigated patterns of change in gist and detail memory as a function of time and sleep stages. As pre-registered, we also ran a version of the model incorporating hippocampal volumetric predictors, but as these were not predictive of memory performance, we re-ran our model without a hippocampal factor and present it in this form for simplicity. We investigated models with both interactions over time, as well as models controlling for time. Descriptive sleep statistics are given in Figure 3B. Before addressing our research questions, we first discuss baseline models.

### Memory predictors

We analyzed only variables in which participants achieved above-chance and off-ceiling performance as of Pre-Sleep, to ensure that our measures were sensitive to change in both a positive and negative direction. All performance measures were off ceiling and off floor. One-sample *t* tests showed that all of the outcome variables in AM, TI, and VSL were significantly above chance and below ceiling as of Pre-Sleep, all *ps* < .001. In the DRM task, one-sample *t* tests showed that memory for summary gist was above chance for Pre-Sleep,  $t(68) = 2.836$ ,  $p = .006$ . However, at Post-Sleep and Day7, summary gist was not significantly above chance. Word detail memory was not above chance for any time points, so we excluded this variable from subsequent analyses.

To explore possible relationships and redundancies among our behavioural memory measures, we inspected a correlation matrix, focusing on relationships involving measures from the same task (Fig. 3A), and to a more limited extent, across tasks. Because the goal of this step was to limit our predictors rather than form inferences about tasks, we did not apply multiple-corrections comparisons in this step. As there were strong correlations in all

tasks, to simplify our analyses, we combined gist measures in our different tasks: first-order and second-order inference memory into an inferential gist measure; non-deterministic and deterministic sequence memory into a statistical learning measure; and super-category, category, and summary gist into an associative gist measure. As a result of this step, the remainder of our analyses concerned only three variables: summary gist, inferential gist, and associative gist.

Special consideration is owed to collapsing of the VSL task. Fuzzy Trace Theory, one of the prominent frameworks distinguishing between gist and detail memory, defines detail as information that was tested in the exact form it was learned (Brainerd & Reyna, 1990). Given this definition, we initially felt deterministic sequence memory could be considered a detail measure and non-deterministic sequence memory a gist measure, which is the framework we followed in our preregistration. However, as both deterministic and non-deterministic sequences require extracting patterns from a sequence, and as we found them both to be correlated in the analysis above, we feel they are both better-represented as gist measures. Non-deterministic sequences additionally require participants to sift through more noise than deterministic sequences, so can be considered higher on a hierarchy of gist. A better detail measure for the task would have been a measure of participants' memory for individual shapes (not measured in the current analysis).

Hence, we were left with four putative detail memory predictors: "instance" and "detail" probes in our AM test (scene-cued object recognition), memory for premise pairs (TI recognition of explicitly studied shape relations), and individual word recall (DRM). As we excluded individual word recall from analysis due to low performance (as discussed above), we were left with the AM and TI measures only. We performed MANOVA analyses to assess divergence of gist and detail over time for these two tasks. Associative gist (AM and DRM) decreased by 55%, whereas instance memory (AM) decreased by 15%, and detail (AM) by 6%. For AM, there was a significant MANOVA for Time differences across associative gist, instance and detail memory,  $F(2, 179) = 20.157, p < .001$ . Follow-up ANOVAs indicated significant decay rates in associative gist,  $F(2, 179) = 66.998, p < .001$ , and instance memory,  $F(2, 179) = 27.959, p < .001$ , but not detail memory, although a trend was revealed in this direction,  $F(2, 179) = 2.604, p = .077$ . Inferential gist increased by 0.6%, whereas premise pairs decreased by 2%. For TI, the MANOVA for time differences across premise pair memory and inferential gist memory was not significant,  $F(2, 206) = 0.214, p = .931$ .

**Baseline Multi-Level Models.** We next constructed a baseline model to compute Intraclass Correlation Coefficients, which indicate the amount of variance in dependent variables that can be attributed to individual differences (and that can therefore be reasonably attributed to individual difference predictors, such as sleep). Variables with 10% or more individual differences variance are considered to have meaningful individual differences. The ICCs were  $\rho = 0.824$  for statistical learning (VSL),  $\rho = 0.053$  for associative gist (DRM and AM), and  $\rho = 0.876$  for inferential gist (TI). This means that, across different memory measures, between 5 and 82% of the variance in memory variables can be attributed to individual differences, although the low intraclass correlation coefficient for associative gist was likely due to large within-subject changes in that index over time. Because most of the models are above threshold, we consider there to be significant individual differences in the memory variables we measured. We therefore proceeded with multi-level modelling as planned.



**Gist Memory over Time.** After correcting for FDR, there was no decline in associative gist between Pre-Sleep to Post Sleep ( $p = .030$ ). However, there was a significant decline from Pre-Sleep to Day7 ( $p < .001$ ). There was no decline in statistical learning between Pre-Sleep and Post-Sleep ( $p = .579$ ) or Pre-Sleep and Day7 ( $p = .033$ ). Similarly, Inferential gist was sustained over time from Pre-Sleep to Post-Sleep ( $p = .671$ ) and Day7 ( $p = .571$ ). After correcting for FDR, we did not find any significant effects of OSPAN,  $ps > .157$ .

**Sleep.** Participants reported an average weeknight sleep of 7 hours and 14 min ( $SD = 62$  min). Average total sleep time for Pre-Sleep test was 5 hours and 59 min ( $SD = 91$  min). Regarding our confirmatory analyses, proportion of REM negatively predicted statistical learning collapsed over time, or controlling for time,  $b = -0.853$ ,  $t(58) = -2.994$ ,  $p = .004$ . After correcting for FDR, we didn't find any significant SWS or TST effects,  $ps > .019$ . Regarding our exploratory analyses, spindles across all sleep stages negatively predicted statistical learning at Day7,  $b = -0.000$ ,  $t(117) = -2.924$ ,  $p = 0.004$ . We did not find any significant NREM or Stage 2 effects,  $ps > .011$ . For the purposes of future hypotheses, we note a positive trend toward REM predicting inferential gist collapsed over time,  $b = 0.655$ ,  $t(59) = 1.632$ ,  $p = .108$ . This may reflect a small effect that we did not have enough power to detect, and should only be treated as an exploratory report that requires future studies with larger sample sizes to confirm the effect. We also note a positive trend towards proportion of NREM sleep positively predicting statistical learning,  $b = .701$ ,  $t(62) = 2.627$ ,  $p = .011$ .

**Results of hippocampal analysis.** Average anterior hippocampal volumes were 1027 mm<sup>3</sup> ( $SD = 158$  mm<sup>3</sup>) on the left and 1100 mm<sup>3</sup> ( $SD = 123$  mm<sup>3</sup>) on the right. Average posterior hippocampal volumes were 1053 mm<sup>3</sup> ( $SD = 119$  mm<sup>3</sup>) for the left, and 1026 mm<sup>3</sup> ( $SD = 120$  mm<sup>3</sup>) on the right. Average anterior/posterior ratios were 0.98 ( $SD = 0.19$ ) on the left, and 1.09 ( $SD = 0.22$ ) on the right. In this study, we collected data from a narrow age range (22-35) among healthy adults. We preregistered that if age significantly predicts either anterior and posterior hippocampal volumes in a regression, we will include age as a covariate. If age does not significantly predict either or pHPC volume, then to simplify our analyses, we will not include age. Age did not significantly predict hippocampal volumes in our sample, so we did not include age in our models ( $p = .425$  and  $p = .885$  for left and right aHPC volumes,  $p = .084$  and  $p = .084$  for pHPC volumes). After controlling for FDR, we did not find any significant effects of aHPC volumes, pHPC volumes or aHPC/pHPC ratio when including these variables in our model, all  $ps > 0.09$ . We do note a trend for left anterior hippocampal volumes predicting statistical learning,  $b = .000$ ,  $t(120) = 1.650$ ,  $p = .102$  and negatively predicting associative gist at Post-Sleep,  $b = -.001$ ,  $t(115) = -1.697$ ,  $p = .093$ . We also note a trend for the right anterior-posterior ratio predicting inferences at Day7,  $b = -.139$ ,  $t(103) = -1.635$ ,  $p = .105$ .

## Discussion

The goal of our study was to investigate the relationship of time and sleep stages on various forms of gist memory. We found a clear behavioural dissociation between inferential gist and statistical learning on the one hand, which were sustained over the course of a week, and associative and summary gist on the other, which decayed over the same period. Thus, not all gist memory behaves the same over time, and among the forms of gist we evaluated, inferential gist and statistical learning appeared to be uniquely protected by consolidation processes supportive of long-term retention. We also found that REM sleep negatively predicted statistical learning over time, consistent with the proposal



that REM sleep may contribute to discretization of information (and thereby working against the extraction of regularities from experienced events). By contrast, hippocampal volumes were not a reliable predictor of longitudinal effects.

Importantly, TI and VSL are two tasks in which linking of multiple, temporally discrete episodes contributes to discovery of underlying rules. In TI, performance benefits from acquisition of an overarching structural or schematic framework, such that any inference or premise pair can be referenced to this framework to determine the correct response (similar to insight tasks, Wagner, Gais, Haider, Verleger, & Born, 2004, and artificial grammars, Gomez, Bootzin, & Nadel, 2006). Such a framework could be revealed through the synthesis of episodes characterizing individual premise pairs. Similarly, the VSL task required identification of temporal relations among elements of noisy sequences; in that task, alignment of discrete episodes could reveal these regularities. In contrast, our DRM and AM tasks involved temporally contiguous, self-contained episodes, and would not stand to benefit from such cross-episode synthesis, as no task-relevant insight exists to be discovered. We therefore argue that consolidation processes most contribute to forms of gist in which integration of discrete episodes is beneficial. A related idea is proposed by Stickgold and Walker (2013), who distinguish between gist extraction from sets, and rule extrapolation from relations. Our findings could alternately be viewed in the perspective that rules extracted from relations are retained for long-term generalization, while gist extraction from sets are not.

Our finding that inferential gist is retained over sleep and time is consistent with previous research comparing sleep and wake groups (Ellenbogen et al., 2007; Lau et al., 2010). Although it is possible that the retention in memory is due to repeated testing, we did not find a significant test-retest effect when testing twice during the Pre-Sleep session. Furthermore, each task was presented to participants in a counterbalanced order, and no one task was deemed more important, so it is unlikely that participants selectively encoded information from TI and VSL above other tasks. In our data, we did not find any significant predictive effects of sleep stages on inferential gist at specific time points or collapsed over time. Speculatively, the absence of stimuli during sleep could be what promotes higher inferential gist memory in sleep rather than wake groups. We do note, however, that we observed a trend towards a positive REM prediction.

We also found that statistical learning was retained over the course of a week. Previous research found higher scores in sleep compared to wake groups for probabilistic learning (Djonlagic et al., 2009), suggesting that sleep, rather than just time, may underly the current finding of sustained statistical learning over time. We found that deterministic sequence memory improved with repeated testing during Pre-Sleep, so it is possible that retention over time can be partially attributed to repeated testing. Overall in that study, structured relational memories and repeated cooccurring memories were retained after sleep, and associative memories decayed over sleep.

## **Sleep Stages**

Proportion of REM predicted reduced statistical learning controlling for time, an effect not found with total sleep time. As this effect was found collapsing over time rather than interaction with a specific time point, one possible explanation is that a waking mechanism analogous to REM sleep exists that inhibits statistical learning at initial test and other time points. As mentioned above, Landmann et al. (2014) propose that REM sleep is responsible for a process called schema disintegration, which disbands existing schemas and allows for creativity. Considering this hypothesis, participants with higher proportions of REM sleep may have weaker statistical learning schemas. In contrast to previous research, we did not find any evidence that SWS predicts inferential gist,

statistical learning, or associative gist (Lau et al., 2010 for transitive inference; Durrant et al., 2011 for statistical learning). We also did not find evidence to support the theory proposed by Landmann et al. (2014) that schema integration (of which inferential gist is a special case) and schema formation (statistical learning) takes place during SWS or NREM sleep. We do note, however, a positive trend towards NREM sleep predicting statistical learning. Hence, an active sleep mechanism to retain statistical learning may exist in addition to a negative (REM) inhibitory mechanism.

In our exploratory analyses, we found that spindles negatively predicted statistical learning at Day7. In other words, if participants had more spindles the night following encoding, they performed more poorly on statistical learning one week later. Tamminen, Payne, Stickgold, Wamsley, and Gaskell (2010) found evidence that spindles are associated with the integration of new memories. Given this framework, one possibility is that integration processes associated with spindles integrated across the sequence as a whole, rather than discrete triplets, and therefore inhibited participants' ability to retain statistical learning.

### **Relationships among Gist and Detail Memory Measures**

Looking at the relationships among gist and detail measures, we found within-task correlations across gist and detail memory in all of our tasks. Hence, gist memories may be dependent on detail memories (or vice versa). As mentioned above, inferential gist and statistical learning would fall under rule extrapolation, whereas category gist and summary gist would fall under gist extraction. Looking within rule extrapolation measures, first order inferences (a component of inferential gist) are negatively correlated with deterministic sequences (a component of statistical learning). However, gist extraction measures (category and summary gist) are correlated. Thus, it does not seem that rule extraction across tasks is trait-like within individuals, whereas gist extraction across tasks may be trait-like.

We also found correlations between premise pair memory and associative memory measures, suggesting an associative cognitive component involved in learning premise pair relationships (two shapes in TI, words and scenes in AM). This idea is also consistent with the lack of a correlation between premise pairs and detail memory, as during detail questions participants had to distinguish only the correct detail arrangement they had seen, and did not need to retrieve the word-scene association. Lastly, summary gist memory was correlated with statistical learning and associative memory, which were not correlated with one another. Summary gist has a gist extraction component, as well as a temporal component as during study, individual words move quickly on the screen. VSL required participants to watch a quickly moving sequences of shapes and consolidate them immediate into patterns, which may be the cognitive component correlated to summary gist.

Brainerd and Reyna (2005) suggested that gist traces are more resistant to forgetting than detail traces. Our omnibus MANOVA for AM and DRM tasks was significant, with follow-up test indicating significant decreases only in associative gist and instance memory. Hence, associative gist traces are more rapidly forgotten over time than detail traces and detail may be preferentially consolidated in this task. This goes against our earlier hypothesis that gist memory would be more resistant to forgetting than detail memory. Our omnibus MANOVA for transitive inference was not significant, so we did not find any evidence that inferential gist memory (TI) is more resistant to decay than premise pairs (TI).

### **Hippocampal Volumes**

After correcting for FDR, we did not find any significant hippocampal effects. Previous studies have found activation in the right aHPC during overlapping transitive inference pairs (Heckers, Zalesak, Weiss, Ditman, & Titone, 2004), as well activation in the aHPC in more distant (compared to more proximal) premise pairs (Collin et al., 2015). Thus, although inferential gist is likely to be encoded in the aHPC, larger aHPC volumes do not seem to predict better inferential gist memory. Previous research also found activation in the right hippocampus during VSL (Turk-Browne, Scholl, Chun, Johnson, 2009). One obvious distinction between these studies and ours is that we measured individual differences in hippocampal volumes, rather than activation in the aHPC and pHPC, and there is rarely correspondence across these measures. However, we did observe trend-level relations that left anterior hippocampal volumes positively predicted statistical learning, but negatively predicted associative gist at Post-Sleep, which may warrant investigation in future research.

The current design did not allow us to pinpoint the dynamic changes in hippocampal activation and sleep over time. Although we were able to behaviorally measure different kind of gist and relate those to individual differences in hippocampal volumes, there may be time-dependent changes in the activation of the aHPC and pHPC. For instance, in a recent paper, Dandolo and Schwabe (2018) found that activity in the aHPC significantly decreased over time and was related to memory specificity at encoding, whereas pHPC activity remained the same. Tomparny and Davachi (2018) found that feature overlaps emerged in the hippocampus over the course of a week. Future studies could test within an fMRI over three sessions to relate activation in the aHPC to pHPC to time-dependent memory changes.

## **Conclusion**

Because only rules extracted from relations (inferential gist and statistical learning), rather than associative memories (category and summary gist) were retained over the course of a week, we conclude that consolidation specifically benefits forms of gist involving rule extraction through synthesis of discrete episodes. Furthermore, REM sleep may be involved in schema disintegration, which although potentially beneficial for distinguishing similar events, works against participants' ability to identify contiguous series.

## Box 1. Definitions

|                                |                                                                                                                                                                                                                                                                                                                                                                                                                              |
|--------------------------------|------------------------------------------------------------------------------------------------------------------------------------------------------------------------------------------------------------------------------------------------------------------------------------------------------------------------------------------------------------------------------------------------------------------------------|
| Gist Memory                    | A coarse-grained memory representation that captures the essential underlying features of an experience.                                                                                                                                                                                                                                                                                                                     |
| Detail Memory                  | A fine-grained memory representation that captures specific surface-level features of an experience.                                                                                                                                                                                                                                                                                                                         |
| <b><u>Types of gist</u></b>    |                                                                                                                                                                                                                                                                                                                                                                                                                              |
| Statistical Learning           | Implicit learning of patterns or regularities that are automatically segmented from a continuous environment.                                                                                                                                                                                                                                                                                                                |
| Inferential Gist               | Extraction of relations across non-contiguous events, or extraction of higher-order relationships from lower-order ones.                                                                                                                                                                                                                                                                                                     |
| Summary Gist                   | Abstraction of a theme from a temporally contiguous series of items. Summary gist encapsulates the circumstance commonly observed in a false memory paradigm, such as the word list task employed here, where a category-consistent word is erroneously believed to be present. Multi-item gist extraction or multi-item generalization have been alternate terms used to describe this idea by Stickgold and Walker (2013). |
| Category Gist                  | Characterization of a stimulus at a higher level in the semantic hierarchy than was experienced.                                                                                                                                                                                                                                                                                                                             |
| <b><u>Related concepts</u></b> |                                                                                                                                                                                                                                                                                                                                                                                                                              |
| Gist Extraction                | Scanning of information and extraction of patterns or essential meaning. This can be an immediate or gradual process.                                                                                                                                                                                                                                                                                                        |
| Schema                         | We use the distinction put forth by Robin and Moscovitch (2017): a gist representation is specific to a single episode, whereas a schema is a more abstract representation from similar episodes. Participants in our study experience only one study phase, so we refer to the resulting memories as gist memories.                                                                                                         |

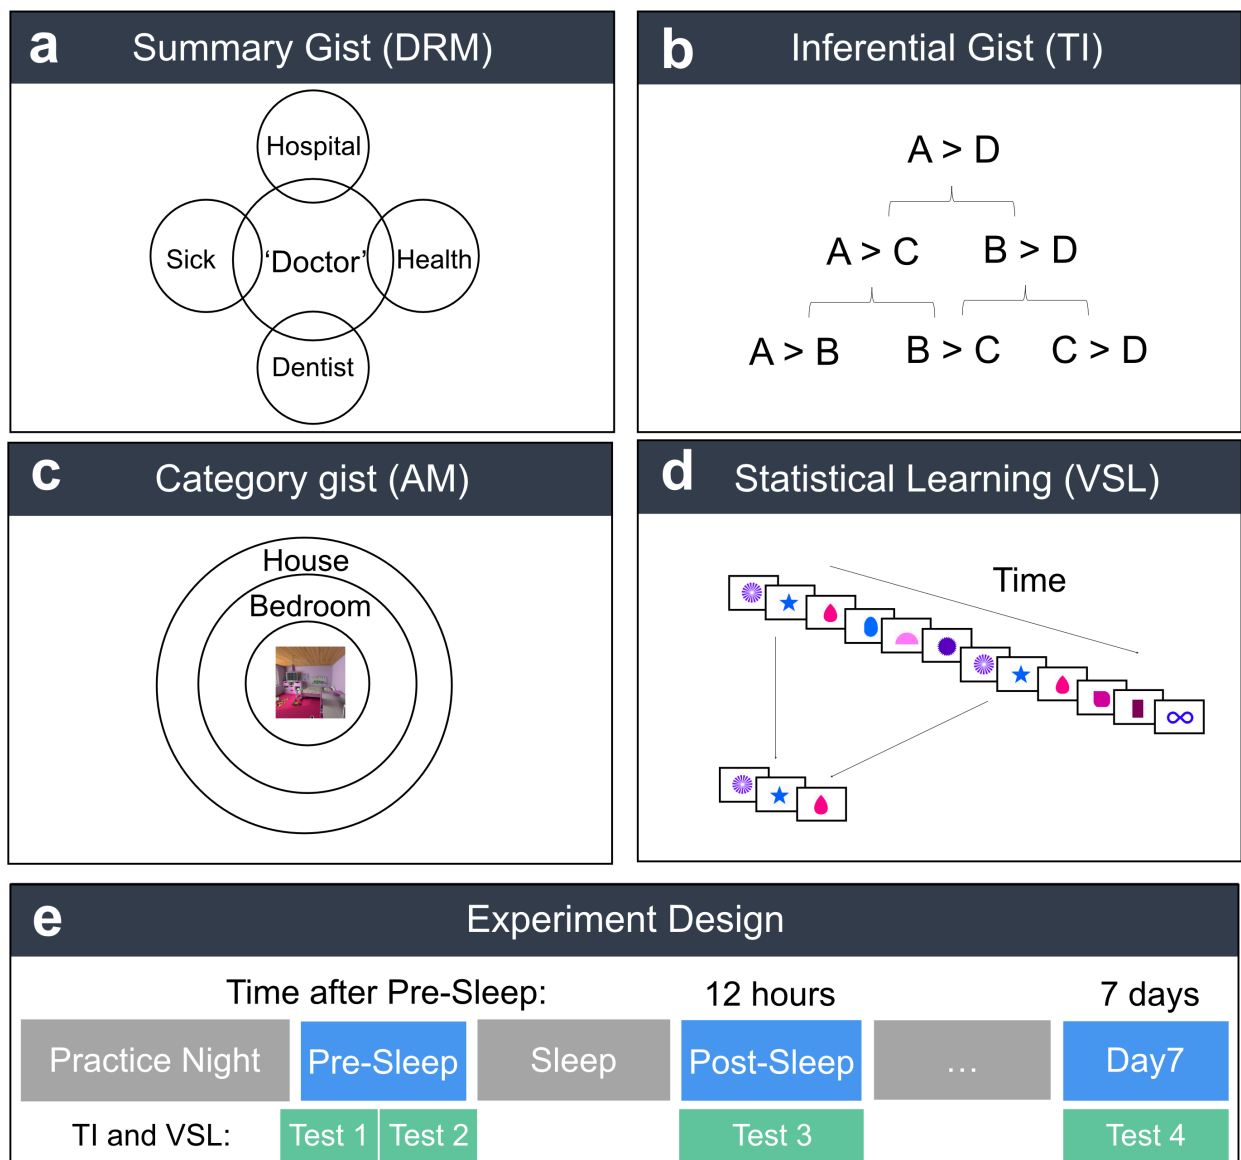

**Figure 1.** Multiple conceptualizations of gist. a) Conceptual illustration of overlapping meaning between studied words and the unstudied “gist” word in the DRM task. b) Conceptual illustration of studied premise pairs on the bottom row, unstudied first-order inferences on the second row, and unstudied second order inferences on the top row. c) Conceptual illustration of gist internal to an individual stimulus. Participants studied word-scene pairs, and were then asked about the scene’s category (e.g., bedroom) and super-category (e.g., house). d) The left-hand panel shows a sequence presented over time, and one triplet which is repeated in the sequence. e) Study design. Participants first completed a practice night with the Sleep Profiler. Then they completed a study and first test session (Pre-Sleep test), which included two test-retests, Test 1 and Test 2 for TI and VSL tasks. Twelve hours and 7 days later participants completed a second (Post-Sleep Test) and third (Day 7) test session, respectively.



Table 1

*Intra-class Correlations between the Sleep Profiler Automated Scoring System and two Independent Raters*

---

| Sleep stages | Intra-class correlations (ICCs) | Inter-rater ICCs |
|--------------|---------------------------------|------------------|
| TST          | 0.855                           | 0.982            |
| SWS          | 0.819                           | 0.669            |
| REM          | 0.798                           | 0.988            |

---

Table 2  
*Memory performance at Pre-Sleep.*

| Memory Variable             | Mean accuracy | Standard Deviation |
|-----------------------------|---------------|--------------------|
| Premise Pairs               | 0.698         | 0.155              |
| First Order Inferences      | 0.605         | 0.201              |
| Second Order Inferences     | 0.631         | 0.258              |
| Deterministic Sequences     | 0.678         | 0.204              |
| Non-Deterministic Sequences | 0.660         | 0.176              |
| Super-Category              | 0.770         | 0.133              |
| Category                    | 0.817         | 0.127              |
| Instance                    | 0.915         | 0.094              |
| Detail                      | 0.661         | 0.124              |
| Summary Gist                | 0.321         | 0.939              |

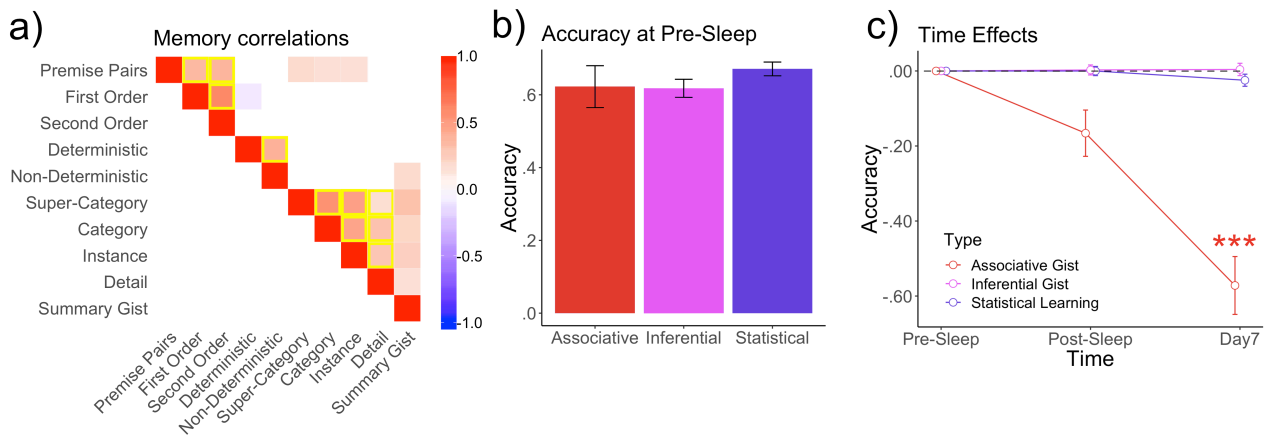

**Figure 2.** a) Correlations among dependent variables averaged over time. Yellow boxes indicate potential relationships among variables that are within the same task. Missing values indicate non-significant relationships. b) Time effects for all three dependent measures. Associative memory significantly decreased from Pre-Sleep test to both Post-Sleep test and Day7. Inferential gist was retained from Pre-Sleep test to both Post-Sleep test and Day7. Statistical learning significantly decreased from Pre-Sleep test to Day7.

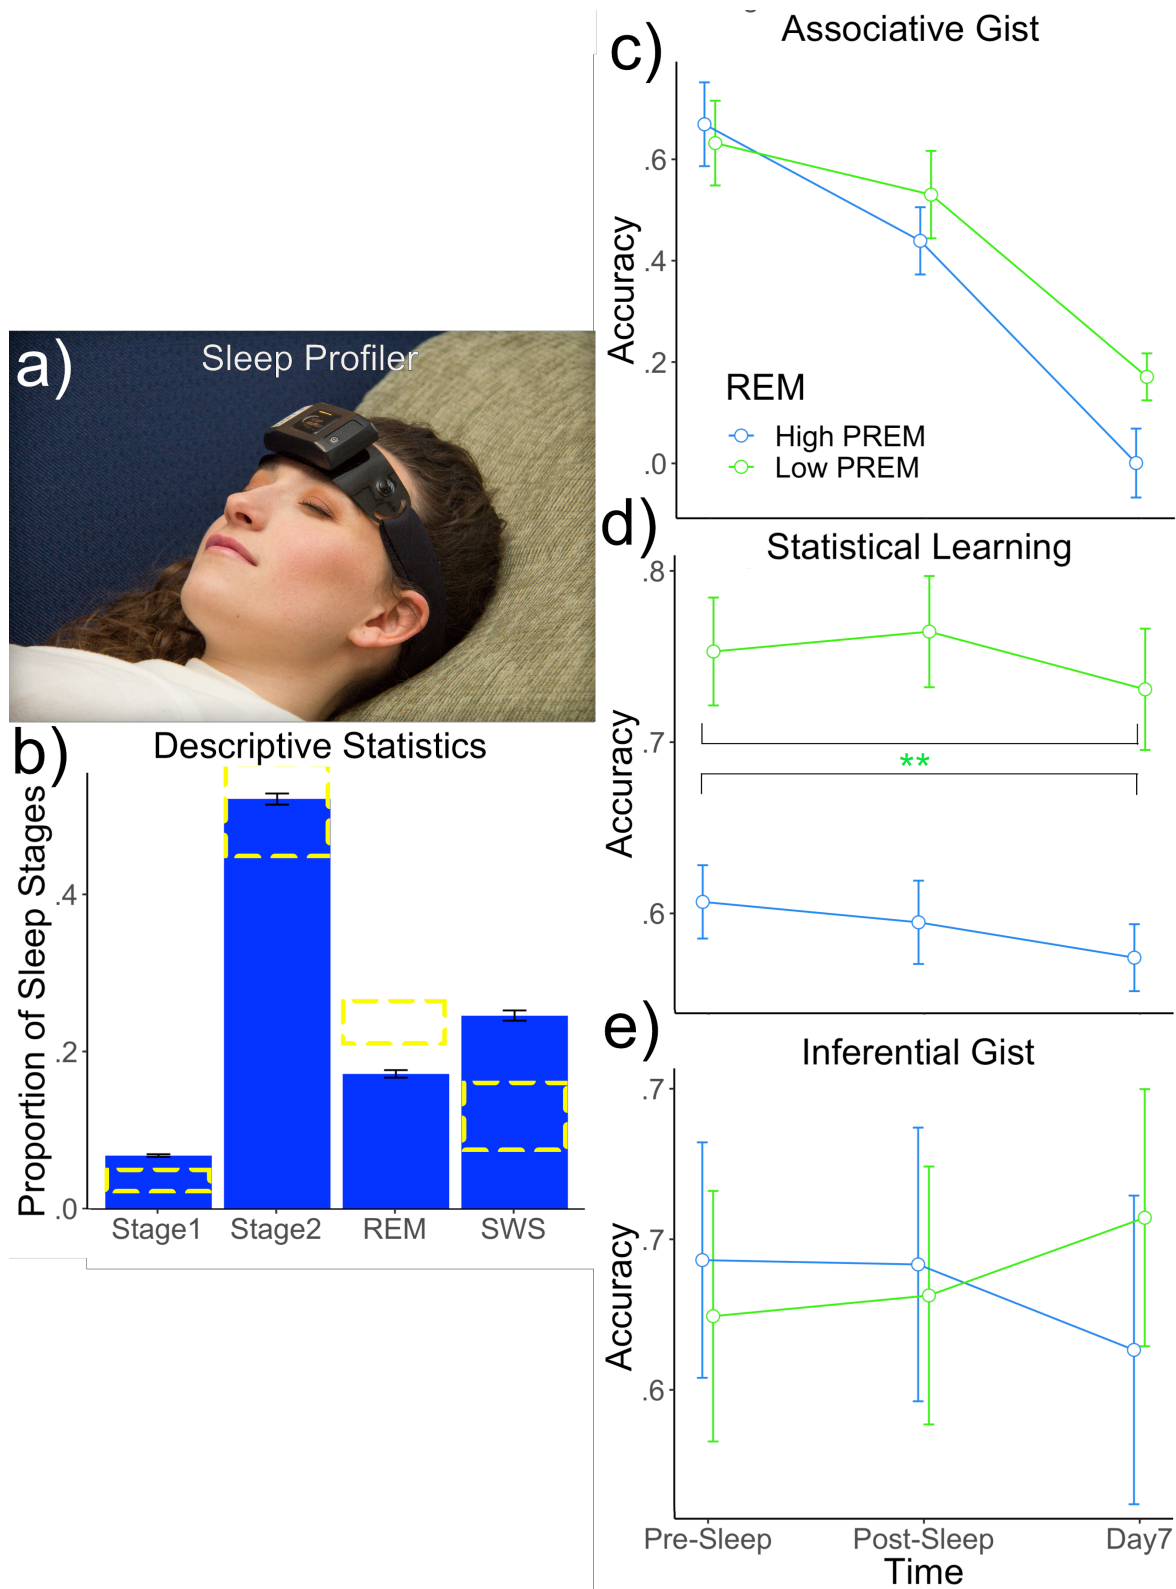

**Figure 3.** a) Photograph of the Sleep Profiler, a single-channel EEG headband with dual EOG that participants took home to record their sleep. b) Bar plot showing descriptive statistics in this study compared to general population norms derived from Carskadon and Dement (2011). c-e) High and low REM groups across statistical learning, associative gist, and inferential gist measures. Proportion of REM significantly negatively predicted statistical learning collapsing over or controlling for time.

## References

- Abe, N., Okuda, J., Suzuki, M., Sasaki, H., Matsuda, T., Mori, E., ... & Fujii, T. (2008). Neural correlates of true memory, false memory, and deception. *Cerebral Cortex*, *18*(12), 2811-2819.
- Benjamini, Y., & Hochberg, Y. (1995). Controlling the false discovery rate: a practical and powerful approach to multiple testing. *Journal of the Royal statistical society: series B (Methodological)*, *57*(1), 289-300.
- Brainerd, C. J., & Reyna, V. F. (1990). Gist is the grist: Fuzzy-trace theory and the new intuitionism. *Developmental Review*, *10*(1), 3-47.
- Brainerd, C. J., & Reyna, V. F. (2005). *The science of false memory*. Oxford University Press.
- Carskadon, M. A., & Rechtschaffen, A. (2011). Monitoring and staging human sleep. *Principles and practice of sleep medicine*, *5*, 16-26.
- Chadwick, M. J., Bonnici, H. M., & Maguire, E. A. (2014). CA3 size predicts the precision of memory recall. *Proceedings of the National Academy of Sciences USA*, *111*(29), 10720-10725.
- Collin, S. H., Milivojevic, B., & Doeller, C. F. (2015). Memory hierarchies map onto the hippocampal long axis in humans. *Nature neuroscience*, *18*(11), 1562.
- Dandolo, L. C., & Schwabe, L. (2018). Time-dependent memory transformation along the hippocampal anterior-posterior axis. *Nature communications*, *9*(1), 1205.
- Diekelmann, S., & Born, J. (2010). The memory function of sleep. *Nature Reviews Neuroscience*, *11*(2), 114-126.
- Djonlagic, I., Rosenfeld, A., Shohamy, D., Myers, C., Gluck, M., & Stickgold, R. (2009). Sleep enhances category learning. *Learning & Memory*, *16*(12), 751-755.
- Durrant, S. J., Taylor, C., Cairney, S., & Lewis, P. A. (2011). Sleep-dependent consolidation of statistical learning. *Neuropsychologia*, *49*(5), 1322-1331.
- Ellenbogen, J. M., Hu, P. T., Payne, J. D., Titone, D., & Walker, M. P. (2007). Human relational memory requires time and sleep. *Proceedings of the National Academy of Sciences*, *104*(18), 7723-7728.
- Fischl, B., Salat, D. H., van der Kouwe, A. J., Makris, N., Segonne, F., Quinn, B. T., & Dale, A. M. (2004). Sequence-independent segmentation of magnetic resonance images. *Neuroimage*, *23 Suppl 1*, S69-84.
- Gómez, R. L., Bootzin, R. R., & Nadel, L. (2006). Naps promote abstraction in language-learning infants. *Psychological science*, *17*(8), 670-674.
- Hasselmo, M. E. (1999). Neuromodulation: acetylcholine and memory consolidation. *Trends in cognitive sciences*, *3*(9), 351-359.
- Heckers, S., Zalesak, M., Weiss, A. P., Ditman, T., & Titone, D. (2004). Hippocampal activation during transitive inference in humans. *Hippocampus*, *14*(2), 153-162.
- Inquisit 5 [Computer software]. (2017). Retrieved from <http://www.millisecond.com>.
- Jones, M. W., & Wilson, M. A. (2005). Theta rhythms coordinate hippocampal-prefrontal interactions in a spatial memory task. *PLoS biology*, *3*(12), e402.
- Kleiner, M., Brainard, D., Pelli, D., Ingling, A., Murray, R., & Broussard, C. (2007). What's new in Psychtoolbox-3. *Perception*, *36*(14), 1.
- Landmann, N., Kuhn, M., Piosczyk, H., Feige, B., Baglioni, C., Spiegelhalder, K., ... & Nissen, C. (2014). The reorganisation of memory during sleep. *Sleep Medicine Reviews*, *18*(6), 531-541.
- Lau, H., Tucker, M. A., & Fishbein, W. (2010). Daytime napping: Effects on human direct associative and relational memory. *Neurobiology of learning and memory*, *93*(4), 554-560.



- Levendowski, D. J., Ferini-Strambi, L., Gamaldo, C., Cetel, M., Rosenberg, R., & Westbrook, P. R. (2017). The accuracy, night-to-night variability, and stability of frontopolar sleep electroencephalography biomarkers. *Journal of Clinical Sleep Medicine*, 13(06), 791-803.
- Lewis, P. A., & Durrant, S. J. (2011). Overlapping memory replay during sleep builds cognitive schemata. *Trends in cognitive sciences*, 15(8), 343-351.
- Lopez, N., Previc, F. H., Fischer, J., Heitz, R. P., & Engle, R. W. (2012). Effects of sleep deprivation on cognitive performance by United States Air Force pilots. *Journal of Applied Research in Memory and Cognition*, 1(1), 27-33.
- Lucey, B. P., Mcleland, J. S., Toedebusch, C. D., Boyd, J., Morris, J. C., Landsness, E. C., ... & Holtzman, D. M. (2016). Comparison of a single-channel EEG sleep study to polysomnography. *Journal of sleep research*, 25(6), 625-635.
- Marshall, L., & Born, J. (2007). The contribution of sleep to hippocampus-dependent memory consolidation. *Trends in cognitive sciences*, 11(10), 442-450.
- Matorina, N., & Poppenk, J. (2019, March 14). Sleep Contributions to Hippocampal Consolidation of Gist and Detail Memory. Retrieved from [osf.io/kqc7z](https://osf.io/kqc7z)
- McGraw, K. O., & Wong, S. P. (1996). Forming inferences about some intraclass correlation coefficients. *Psychological methods*, 1(1), 30.
- Millisecond Software (2015). Automated Operation Span [Computer software]. Retrieved from <https://www.millisecond.com/download/library/ospan/>
- Millisecond Software (2015). Deese-Roediger-McDermott (DRM) False Memory Procedure (Visual) [Computer software]. Retrieved from <https://www.millisecond.com/download/library/falsememories/>
- Millisecond Software (2015). Transitive Inference Task [Computer software]. Retrieved from <https://www.millisecond.com/download/library/TransitiveInferenceTask/>
- Millisecond Software (2015). Automated Operation Span [Computer software]. Retrieved from <https://www.millisecond.com/download/library/ospan/>
- Mountjoy, J., & Poppenk, J. (2015). Introducing SuperPsychToolbox: An Open-Source Tool to Facilitate Coding and Analysis of Psychology Experiments. In *Canadian Journal of Experimental Psychology*, 69(4), 332-332.
- Nair, S. N., Czaja, S. J., & Sharit, J. (2007). A multilevel modeling approach to examining individual differences in skill acquisition for a computer-based task. *The Journals of Gerontology Series B: Psychological Sciences and Social Sciences*, 62(1), 85-96.
- Stahl, C., & Klauer, K. C. (2008). A simplified conjoint recognition paradigm for the measurement of gist and verbatim memory. *Journal of Experimental Psychology: Learning, Memory, and Cognition*, 34(3), 570.
- Stickgold, R., & Walker, M. P. (2013). Sleep-dependent memory triage: evolving generalization through selective processing. *Nature neuroscience*, 16(2), 139-145.
- R Core Team (2016). R: A language and environment for statistical computing. R Foundation for Statistical Computing, Vienna, Austria. Retrieved from <https://www.R-project.org/>.
- Rasch, B., & Born, J. (2013). About sleep's role in memory. *Physiological reviews*, 93(2), 681-766.
- Robin, J., & Moscovitch, M. (2017). Details, gist and schema: hippocampal-neocortical interactions underlying recent and remote episodic and spatial memory. *Current Opinion in Behavioral Sciences*, 17, 114-123.
- Romero, J. E., Coupé, P., & Manjón, J. V. (2017). HIPS: A new hippocampus subfield segmentation method. *NeuroImage*, 163, 286-295.

- Payne, J. D., Schacter, D. L., Propper, R. E., Huang, L. W., Wamsley, E. J., Tucker, M. A., ... & Stickgold, R. (2009). The role of sleep in false memory formation. *Neurobiology of learning and memory*, 92(3), 327-334.
- Pinheiro, J., Bates, D., DebRoy, S., Sarkar, D., & Team, R. C. (2007). Linear and nonlinear mixed effects models. *R package version*, 3(57), 1-89.
- Poppenk, J., Evensmoen, H. R., Moscovitch, M., & Nadel, L. (2013). Long-axis specialization of the human hippocampus. *Trends in cognitive sciences*, 17(5), 230-240.
- Sotiropoulos, S. N., Jbabdi, S., Xu, J., Andersson, J. L., Moeller, S., Auerbach, E. J., ... Behrens, T. E. (2013). Advances in diffusion MRI acquisition and processing in the Human Connectome Project. *NeuroImage*, 80, 125-143.
- Tamminen, J., Ralph, M. A. L., & Lewis, P. A. (2013). The role of sleep spindles and slow-wave activity in integrating new information in semantic memory. *Journal of Neuroscience*, 33(39), 15376-15381.
- Tomparry, A., & Davachi, L. (2018). Consolidation Promotes the Emergence of Representational Overlap Across Related Memories in the Hippocampus and Medial Prefrontal Cortex. Available at SSRN 3155632.
- Turk-Browne, N. B., Jungé, J. A., & Scholl, B. J. (2005). The automaticity of visual statistical learning. *Journal of Experimental Psychology: General*, 134(4), 552.
- Turk-Browne, N. B., Scholl, B. J., Chun, M. M., & Johnson, M. K. (2009). Neural evidence of statistical learning: Efficient detection of visual regularities without awareness. *Journal of cognitive neuroscience*, 21(10), 1934-1945.
- Turk-Browne, N. B., Scholl, B. J., Johnson, M. K., & Chun, M. M. (2010). Implicit perceptual anticipation triggered by statistical learning. *Journal of Neuroscience*, 30(33), 11177-11187.
- Unsworth, N., Heitz, R. P., Schrock, J. C., & Engle, R. W. (2005). An automated version of the operation span task. *Behavior research methods*, 37(3), 498-505.
- Wagner, U., Gais, S., Haider, H., Verleger, R., & Born, J. (2004). Sleep inspires insight. *Nature*, 427(6972), 352.
- Walker, M. P., & Stickgold, R. (2010). Overnight alchemy: sleep-dependent memory evolution. *Nature Reviews Neuroscience*, 11(3), 218-218.
- Yordanova, J., Kolev, V., Wagner, U., Born, J., & Verleger, R. (2012). Increased alpha (8-12 Hz) activity during slow wave sleep as a marker for the transition from implicit knowledge to explicit insight. *Journal of Cognitive Neuroscience*, 24(1), 119-132.
- Yordanova, J., Kolev, V., Wagner, U., & Verleger, R. (2009). Covert reorganization of implicit task representations by slow wave sleep. *PLoS One*, 4(5), e5675.

## **Acknowledgements**

This research was funded by Natural Sciences & Engineering Research Council Discovery Grant 03637 (J.P.), which also supported N.M. Infrastructure funding was provided by Canada Foundation for Innovation – John R. Evans Leaders Fund (J.P.), and a Queen's University Research Initiation Grant to J.P., who was supported by the Canada Research Chairs program. We gratefully acknowledge Gillian Marvel for assistance with behavioural and sleep EEG data collection; Julie Tseng, Lauren DeMone, and Natalie Doan with scheduling; Julie Tseng and Don Brien with MRI data acquisition; and Justin Siu, Roland Dupras and Mike Lewis with technical support; Holly Mcdougall for modelling and Eric Brousseau for photographing and editing our Sleep Profiler photograph.
